# Supplementary material
Source: MDPI journal article supplement (https://www.mdpi.com/1424-2818/15/4/531)
Supplement: s1 [file s1]

## Benthic characterization of mesophotic communities based on optical depths in the Southern Mexican Pacific coast (Oaxaca)

Miguel Ángel Pérez-Castro, Gal Eyal, Gerardo Esteban Leyte-Morales, Gustavo Hinojosa-Arango, Susana Enríquez

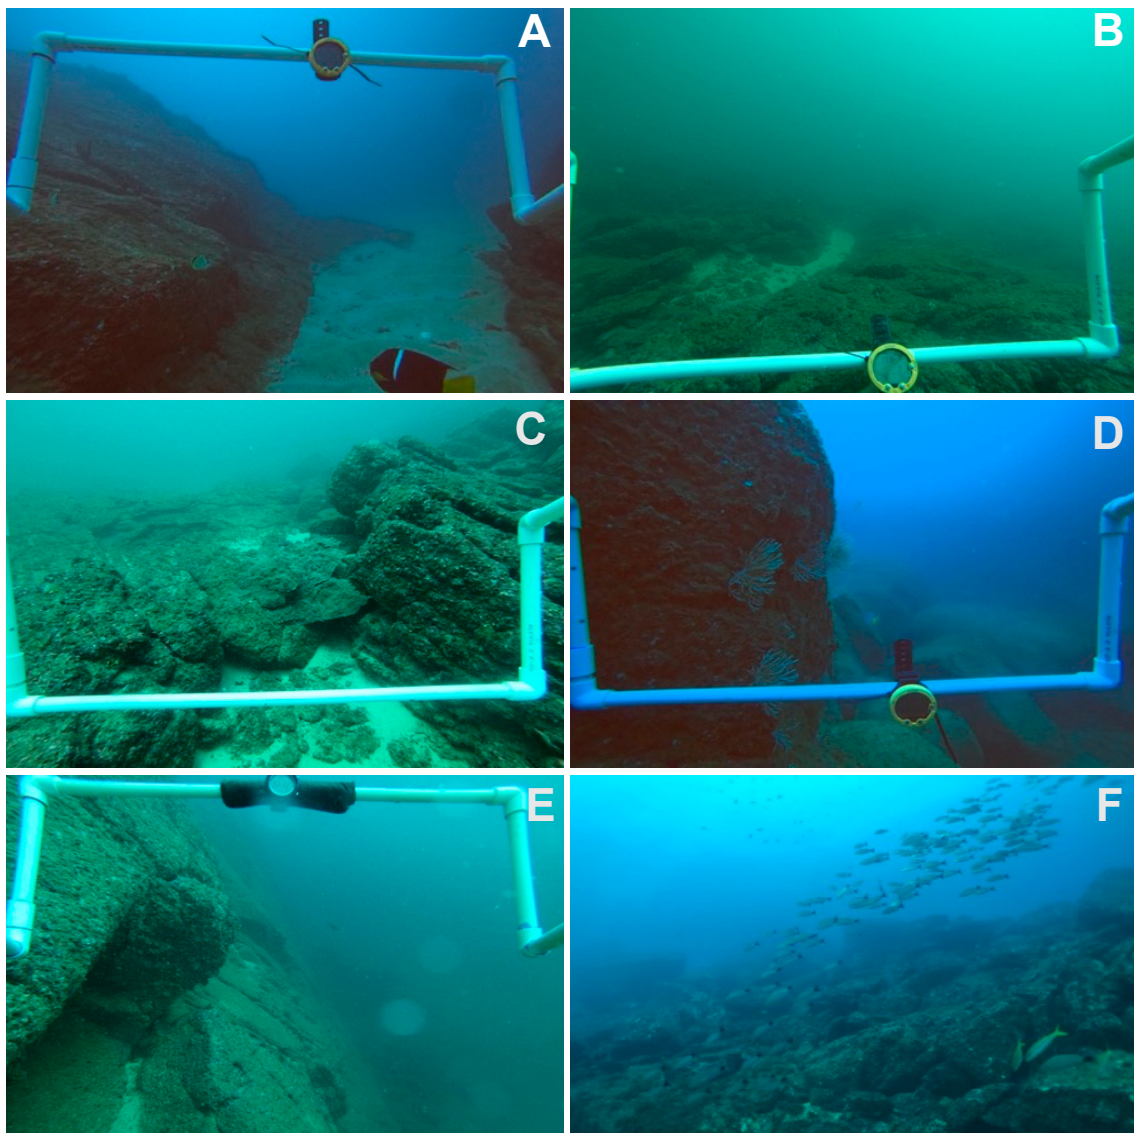

Figure S1. Geofeatures and their slope grade : A) 'Ridge' at Tijera (20-50°), B) 'Ledge' at Estacahuite (0 < 20°), C) 'Ledge' at Tijera (0 < 20°), D) Slope at Salchi (20-50°), E) Slope at Riscalillo (> 50°), and F) 'Bajo' at Boquilla.

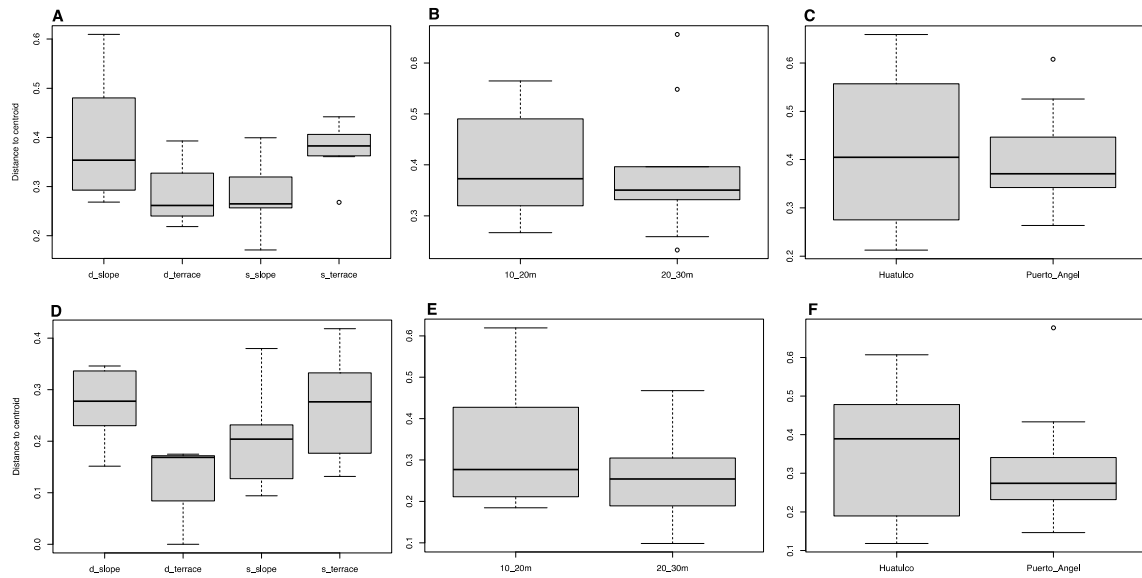

Figure. S2. Boxplots represent b-dispersion, a measure of within b-diversity that assesses the distance of the communities to the group centroid; (A-C) using Jaccard dissimilarities matrix; (D-F) using Bray-Curtis dissimilarities matrix which include relative coral abundance information. The p-value of all groups was not significant ( $p > 0.05$ ).

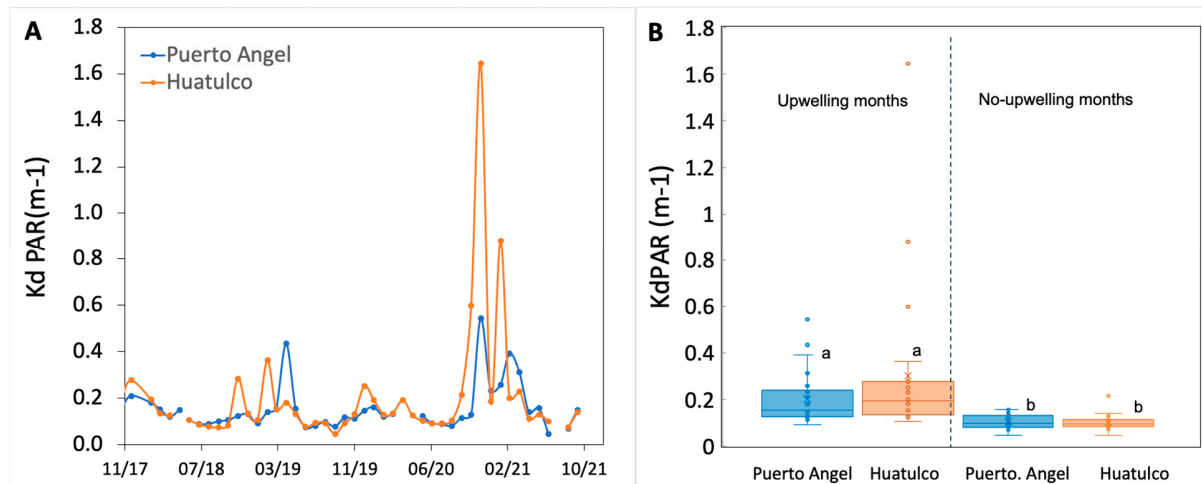

Figure. S3 Variability of  $Kd_{PAR}$  calculated from MODIS-Aqua satellite data ( $Kd_{490}$ ) during four years A) time-series of  $Kd_{PAR}$  in Puerto Angel and Huatulco, Oaxaca, Mexico. B) Difference between upwelling and no upwelling months.

Table S1. Means and standard error of optical mesophotic depths boundaries during upwelling and non-upwelling months in different years.

| Years                    | Optical depths (%) | Seasonal upwellings (Nov-Apr) |              | No Upwellings (May-Oct) |              |
|--------------------------|--------------------|-------------------------------|--------------|-------------------------|--------------|
|                          |                    | Puerto Angel (m)              | Huatulco (m) | Puerto. Angel (m)       | Huatulco (m) |
| 2017-18                  | z10%               | 14.1                          | 12.3         | 21.7                    | 26.7         |
|                          | z1%                | 28.1                          | 24.6         | 43.4                    | 53.4         |
|                          | z0.1%              | 42.2                          | 36.9         | 65.0                    | 80.1         |
| 2018-19                  | z10%               | 17.9                          | 11.1         | 22.9                    | 25.9         |
|                          | z1%                | 35.8                          | 22.1         | 45.8                    | 51.7         |
|                          | z0.1%              | 53.7                          | 33.2         | 68.7                    | 77.6         |
| 2019-20                  | z10%               | 17.1                          | 13.4         | 23.1                    | 18.9         |
|                          | z1%                | 34.2                          | 26.7         | 46.2                    | 37.8         |
|                          | z0.1%              | 51.3                          | 40.1         | 69.3                    | 56.6         |
| 2020-21                  | z10%               | 7.4                           | 3.7          | 20.4                    | 20.6         |
|                          | z1%                | 14.8                          | 7.4          | 40.8                    | 41.3         |
|                          | z0.1%              | 22.2                          | 11.1         | 61.2                    | 61.9         |
| <b>Average 2017-2021</b> | z10%               | 14.1 ± 2.8                    | 10.1 ± 2.5   | 22.0 ± 0.7              | 23.0 ± 2.2   |
|                          | z1%                | 28.2 ± 5.5                    | 20.2 ± 5.1   | 44.0 ± 1.4              | 46.0 ± 4.4   |
|                          | z0.1%              | 42.3 ± 8.3                    | 30.3 ± 7.6   | 66.1 ± 2.2              | 69.1 ± 6.7   |

Table S2. List of benthic species in the study locations.

| Phylum Polifera      |                 |                  |                                           |              |          |
|----------------------|-----------------|------------------|-------------------------------------------|--------------|----------|
| Class                | Order           | Family           | Species                                   | Puerto Ángel | Huatulco |
| Demospongiae         | Haplosclerida   | Niphatidae       | <i>Amphimedon texotli</i>                 | X            | X        |
|                      |                 | Chalinidae       | <i>Haliclona caerulea</i>                 | X            | X        |
|                      | Verongiida      | Aplysinidae      | <i>Aplysina clathrata</i>                 | X            | X        |
|                      | Axinellida      | Axinellidae      | <i>Axinella nayaritensis</i>              | X            |          |
|                      | Chondrosiida    | Chondrosiidae    | <i>Chondrosia</i> sp.                     | X            | X        |
|                      | Suberitida      | Halichondriidae  | <i>Ciocalypa</i> sp                       | X            | X        |
|                      | Poecilosclerida | Mycalidae        | <i>Mycale cecilia</i>                     | X            | X        |
| Phylum Cnidaria      |                 |                  |                                           |              |          |
| Anthozoa             | Scleractinia    | Agariciidae      | <i>Pavona</i> cf. <i>Clavus</i>           | X            | X        |
|                      |                 |                  | <i>Pavona duerdeni</i>                    | X            | X        |
|                      |                 |                  | <i>Pavona gigantea</i>                    | X            | X        |
|                      |                 |                  | <i>Pavona varians</i>                     |              | X        |
|                      |                 | Poritidae        | <i>Porites panamensis</i>                 | X            | X        |
|                      |                 | Pocilloporidae   | <i>Pocillopora</i> cf. <i>capitata</i>    | X            | X        |
|                      |                 |                  | <i>Pocillopora eydouxi</i>                | X            | X        |
|                      |                 |                  | <i>Pocillopora</i> cf. <i>verrucosa</i>   | X            | X        |
|                      |                 |                  | <i>Pocillopora damicornis</i>             | X            | X        |
|                      |                 |                  | <i>Pocillopora</i> cf. <i>inflata</i>     |              | X        |
|                      |                 |                  | <i>Pocillopora</i> cf <i>woodjonesi</i>   |              |          |
|                      |                 | Dendrophylliidae | <i>Tubastraea coccinea</i>                | X            | X        |
|                      | Antipatharia    | Antipathidae     | <i>Antipathes</i> cf. <i>galapagensis</i> | X            | X        |
|                      | Malacalcyonacea | Gorgoniidae      | <i>Leptogorgia alba</i>                   | X            | X        |
|                      |                 |                  | <i>Leptogorgia cuspidata</i>              | X            | X        |
|                      |                 |                  | <i>Leptogorgia</i> cf. <i>ena</i>         | X            | X        |
|                      |                 |                  | <i>Leptogorgia rigida</i>                 | X            | X        |
|                      |                 |                  | <i>Pacifigorgia</i> cf. <i>pulchra</i>    | X            |          |
|                      |                 |                  | <i>Pacifigorgia rutila</i>                | X            | X        |
|                      |                 |                  | <i>Pacifigorgia stenobrochis</i>          | X            | X        |
|                      |                 | Plexauridae      | <i>Muricea austera</i>                    |              | X        |
|                      |                 |                  | <i>Muricea fruticosa</i>                  | X            | X        |
|                      |                 |                  | <i>Muricea</i> sp.                        |              | X        |
|                      |                 | Carijoidae       | <i>Carijoa riisei</i>                     |              | X        |
| Phylum Annelida      |                 |                  |                                           |              |          |
| Polychaeta           | Sabellida       | Serpulidae       | <i>Serpula</i> sp.                        | X            | X        |
| Phylum Echinodermata |                 |                  |                                           |              |          |
| Asteroidea           | Valvatida       | Oreasteridae     | <i>Pentacaster cumingi</i>                | X            | X        |
|                      |                 | Ophidiasteridae  | <i>Pharia pyramidata</i>                  | X            | X        |
|                      |                 |                  | <i>Phataria unifascialis</i>              | X            | X        |
| Echinoidea           | Diadematoida    | Diadematidae     | <i>Astropyga pulvinata</i>                | X            |          |
|                      |                 |                  | <i>Diadema mexicanum</i>                  | X            | X        |
|                      | Cidaroida       | Cidaridae        | <i>Eucidaris thouarsii</i>                | X            | X        |
|                      | Camarodonta     | Toxopneustidae   | <i>Toxopneustes roseus</i>                | X            | X        |
|                      |                 |                  | <i>Tripneustes depressus</i>              | X            |          |
| Holothuroidea        | Dendrochirotida | Cucumariidae     | <i>Cucumaria flamma</i>                   | X            | X        |
|                      | Synallactida    | Stichopodidae    | <i>Isostichopus fuscus</i>                | X            | X        |
| Ophiuroidea          | Amphilepidida   | Ophiotrichidae   | <i>Ophiothela mirabilis</i>               | X            | X        |
|                      |                 |                  | <i>Ophiothrix spiculata</i>               |              | X        |
| Phylum Mollusca      |                 |                  |                                           |              |          |

|                           |                 |                  |                              |   |   |
|---------------------------|-----------------|------------------|------------------------------|---|---|
| Bivalvia                  | Pectinida       | Spondylidae      | <i>Spondylus limbatus</i>    | X | X |
|                           | Ostreida        | Margaritidae     | <i>Pinctada mazatlanica</i>  | X | X |
|                           |                 | Pinnidae         | <i>Atrina maura</i>          | X |   |
| Gastropoda                | Neogastropoda   | Muricidae        | <i>Hexaplex brassica</i>     |   | X |
|                           |                 | Conidae          | <i>Conus purpurascens</i>    | X |   |
|                           |                 | Fascioliariidae  | <i>Leucozonia cerata</i>     | X | X |
| <b>Phylum Arthropoda</b>  |                 |                  |                              |   |   |
| Malacostraca              | Decapoda        | Mithracidae      | <i>Mithraculus sp.</i>       | X | X |
|                           |                 | Palinuridae      | <i>Panulirus inflatus</i>    | X | X |
| <b>Phylum Chordata</b>    |                 |                  |                              |   |   |
| Ascidacea                 | Aplousobranchia | Diazonidae       | <i>Rhopalaea birkelandi</i>  | X | X |
| Elasmobranchii            | Myliobatiformes | Urotrygonidae    | <i>Urobatis concentricus</i> | X | X |
| <b>Phylum Chlorophyta</b> |                 |                  |                              |   |   |
| Ulvophyceae               | Cladophorales   | Cladophoraceae   | <i>Cladophora sp.</i>        | X | X |
|                           | Bryopsidales    | Halimedaceae     | <i>Halimeda discoidea</i>    | X |   |
| <b>Phylum Ochrophyta</b>  |                 |                  |                              |   |   |
| Phaeophyceae              | Dictyotales     | Dictyotaceae     | <i>Lobophora sp.</i>         | X |   |
|                           |                 |                  | <i>Padina sp.</i>            | X | X |
|                           |                 |                  | <i>Dictyota humifusa</i>     | X | X |
| <b>Phylum Rhodophyta</b>  |                 |                  |                              |   |   |
| Florideophyceae           | Gigartinales    | Cystocloniaceae  | <i>Hypnea pannosa</i>        | X |   |
|                           | Gracilariales   | Gracilariaceae   | <i>Gracilaria sp.</i>        | X | X |
|                           | Peyssonneliales | Peyssonneliaceae | <i>Cf. Peyssonnelia sp</i>   | X | X |
|                           | Corallinales    | Lithophyllaceae  | <i>Amphiroa misakiensis</i>  | X | X |
|                           |                 |                  | <i>Amphiroa sp.</i>          | X | X |
|                           |                 | Corallinaceae    | <i>Cf. Lithophyllum</i>      | X | X |
| Unidentified              | Unidentified    | Unidentified     | <i>Red blade</i>             | X |   |
| Unidentified              | Unidentified    | Unidentified     | <i>Red filamentous</i>       | X | X |

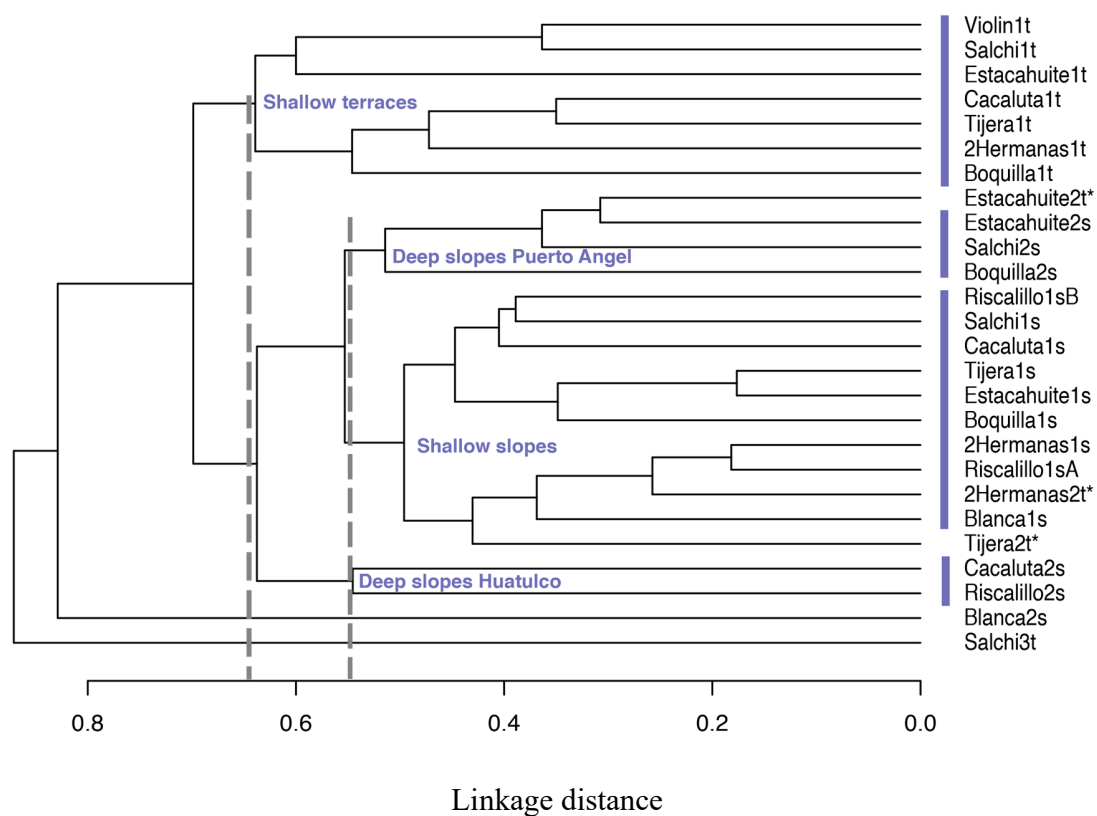

Figure. S4. Dendrogram for hierarchical clustering of the 26 sites, using group-average linking of Jaccard dissimilarities presence/absence data. The two main groups produced by an (arbitrary) threshold dissimilarity of 65% are shown (Shallow terrace and slopes). Three subgroups produced by an (arbitrary) threshold dissimilarity of 55% (deep slopes from Puerto Angel, shallow slopes, and deep slopes from Huatulco). The deep terraces (marked with an asterisk) was clustering with shallow slopes.

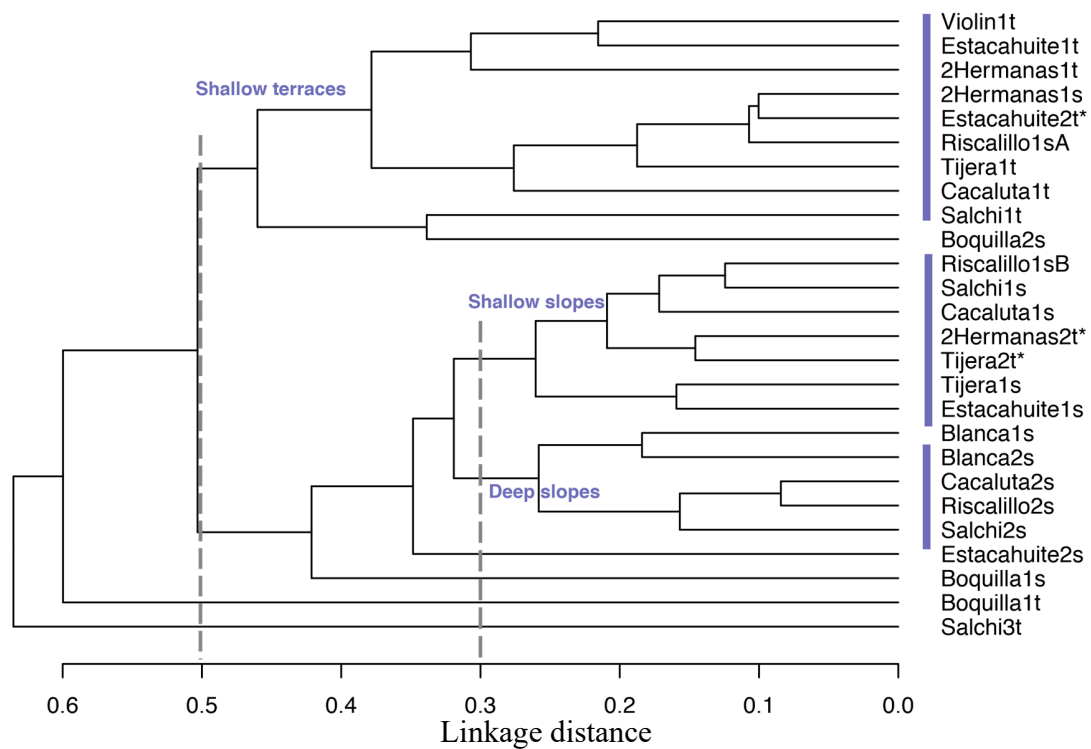

Figure. S5. Dendrogram for hierarchical clustering of the 26 sites, using group-average linking of Bray-Curtis dissimilarities calculated on  $\log(x+1)$  transformed abundance data. The two main groups produced by an (arbitrary) threshold dissimilarity of 50% are shown (Shallow terrace, and slopes). Two subgroups produced by an (arbitrary) threshold dissimilarity of 30% (shallow slopes and deep slopes). The deep terraces (marked with an asterisk) was clustering with shallow slopes.

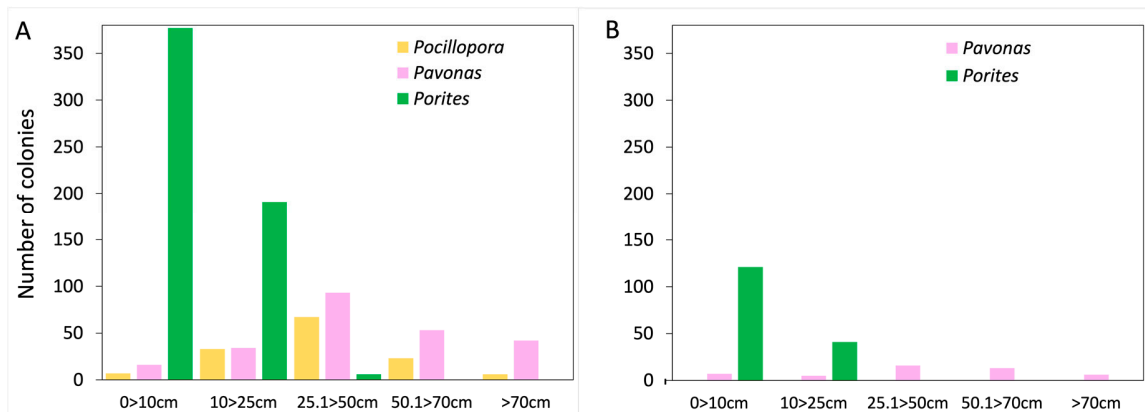

Figure. S6. Size frequency distributions of the three coral genera in the two depth strata, A) 10 > 20 m, B) 20 < 30 m.
